# Supplementary material
Source: PubMed Central journal article supplement (PMC3432570)
Supplement: NIHMS396031-supplement-01.pdf [file NIHMS396031-supplement-01.pdf]

# The Healthy Afterschool Activity and Nutrition Documentation Instrument

Rahma Ajja, MPT, MPH, Michael W. Beets, MEd, MPH, PhD, Jennifer Huberty, PhD, Andrew T. Kaczynski, PhD, Dianne S. Ward, EdD

---

## Appendix A

Healthy Afterschool Activity and Nutrition Documentation (HAAND)

# Healthy Afterschool Activity and Nutrition Documentation (HAAND)

Program name: \_\_\_\_\_

Location: \_\_\_\_\_

Weather: \_\_\_\_\_

Date of observation:  /  /

# children:

# staff:

Program start:

Program end:

| What was served for snack?                                       |     |    | Describe                                  |
|------------------------------------------------------------------|-----|----|-------------------------------------------|
| Did children bring outside <u>food</u> ?                         | YES | NO | If YES, describe...                       |
| Did children bring outside <u>drinks</u> ?                       | YES | NO | If YES, describe...                       |
| Did staff eat/drink foods other than snack in front of children? | YES | NO | If YES, describe...                       |
| Are children allowed to bring electronic media devices           | YES | NO | If YES, describe...                       |
| Total time allocated for physical activity                       |     |    | # minutes scheduled for physical activity |

|  |  |  |
|--|--|--|
|  |  |  |
|  |  |  |
|  |  |  |
|  |  |  |
|  |  |  |
|  |  |  |

Notes:

Healthy Afterschool Program Index (HAPI [Physical Activity])

| Domain                         | Item                   | Source                         | Level                                       |                                                                                                               |                                                                                                                                                |                                                                                             |                                     | Score |
|--------------------------------|------------------------|--------------------------------|---------------------------------------------|---------------------------------------------------------------------------------------------------------------|------------------------------------------------------------------------------------------------------------------------------------------------|---------------------------------------------------------------------------------------------|-------------------------------------|-------|
|                                |                        |                                | 0                                           | 1                                                                                                             | 2                                                                                                                                              | 3                                                                                           | 4                                   |       |
| Policy                         | Written policies       | Document review                | No written policies                         | Written policies, nonspecific language                                                                        | Written policies, explicit language (i.e., measurable)                                                                                         |                                                                                             |                                     |       |
| Child involvement              | Feedback               | Document review or self-report | None                                        | Informal collection                                                                                           | Formal collection                                                                                                                              |                                                                                             |                                     |       |
| Screen time                    |                        | Document review or self-report | >1 hour/day                                 | <1 hour/day                                                                                                   | None allowed                                                                                                                                   |                                                                                             |                                     |       |
| Schedule of physical activity  | Time allocated         | Document review or observation | No scheduled time                           | <25% of afterschool program time                                                                              | 25%-49% of afterschool program time                                                                                                            | ≥50% of afterschool program time                                                            |                                     |       |
|                                | Types of activities    | Document review or observation | None                                        | Limited # of activities                                                                                       | Diverse range of activities that appeal to children of all skill levels                                                                        |                                                                                             |                                     |       |
|                                | Equity                 | Document review or observation | Activities favor single gender              | Activities appeal to both genders                                                                             |                                                                                                                                                |                                                                                             |                                     |       |
| Training for physical activity | Staff training amount  | Document review or self-report | No training for physical activity promotion | <1 hour devoted to physical activity/year                                                                     | 1-4 hours devoted to physical activity/year                                                                                                    | >4 hours/year                                                                               |                                     |       |
|                                | Staff training quality | Document review or self-report | No training for physical activity promotion | Training delivered by noncertified personnel                                                                  | Training delivered by qualified professional (e.g., physical educator, health promotion specialist, graduate degree in health education field) |                                                                                             |                                     |       |
|                                | Parent workshop        | Document review or self-report | None                                        | One per year                                                                                                  | More than two per year                                                                                                                         |                                                                                             |                                     |       |
| Curricula                      |                        | Document review                | None                                        | Non-evidence based curriculum                                                                                 | Evidence-based curriculum                                                                                                                      |                                                                                             |                                     |       |
| Evaluation                     |                        | Document review or observation | None                                        | Limited evaluation (e.g., single time per year)<br>Nonvalid methods (e.g., staff reports, child self-reports) | Ongoing evaluation (e.g., two or more times per year)<br>Nonvalid methods                                                                      | Limited evaluation<br>Valid methods (e.g., pedometers, accelerometers, trained observation) | Ongoing evaluation<br>Valid methods |       |
|                                |                        |                                |                                             |                                                                                                               |                                                                                                                                                |                                                                                             | Total score                         | /25   |

Star rating: 1-5=★; 6-9=★★; 10-14=★★★; 15-21=★★★★; 22-25=★★★★★

**Healthy Afterschool Program Index (HAPI-PA [Physical Activity])**

| <b>Domain</b>                  | <b>Item</b>             | <b>Source</b>                  | <b>Notes/comments</b> |
|--------------------------------|-------------------------|--------------------------------|-----------------------|
| Policy                         | Written policies        | Document review                |                       |
| Child involvement              | Feedback                | Document review or self-report |                       |
| Screen time                    |                         | Document review or self-report |                       |
| Schedule of physical activity  | Time allocated          | Document review or observation |                       |
|                                | Types of activities     | Document review or observation |                       |
|                                | Equity                  | Document review or observation |                       |
| Training for physical activity | Staff training – amount | Document review or self-report |                       |
|                                | Staff training quality  | Document review or self-report |                       |
|                                | Parent workshop         | Document review or self-report |                       |
| Curricula                      |                         | Document review                |                       |
| Evaluation                     |                         | Document review or observation |                       |

Healthy Afterschool Program Index (HAPI-N [Nutrition])

| Domain                     | Item                      | Source                         | Level                   |                                                                                                               |                                                                           |                                                                                                                                          | Score                               |     |
|----------------------------|---------------------------|--------------------------------|-------------------------|---------------------------------------------------------------------------------------------------------------|---------------------------------------------------------------------------|------------------------------------------------------------------------------------------------------------------------------------------|-------------------------------------|-----|
|                            |                           |                                | 0                       | 1                                                                                                             | 2                                                                         | 3                                                                                                                                        |                                     | 4   |
| Policy                     | Written policies          | Document review                | No written policies     | Written policies, nonspecific language                                                                        | Written policies, explicit language (measurable)                          |                                                                                                                                          |                                     |     |
| Child involvement          | Feedback                  | Document review or self-report | None                    | Informal collection                                                                                           | Formal collection                                                         |                                                                                                                                          |                                     |     |
| Quality of snacks          | Fruit                     | Document review or observation | None served             | One time/week                                                                                                 | Two times/week                                                            | Three times/week                                                                                                                         | Four or more times/week             |     |
|                            | Vegetable                 | Document review or self-report | None served             | One time/week                                                                                                 | Two times/week                                                            | Three times/week                                                                                                                         | Four or more times/week             |     |
|                            | Sugar-sweetened beverages | Document review or self-report | Four or more times/week | Three times/week                                                                                              | Two times/week                                                            | One time/week                                                                                                                            | None served                         |     |
|                            | Whole grains              | Document review or self-report | None served             | One time/week                                                                                                 | Two times/week                                                            | Three times/week                                                                                                                         | Four or more times/week             |     |
| Access to vending machines |                           | Document review or observation | Full access             | No access                                                                                                     |                                                                           |                                                                                                                                          |                                     |     |
| Training                   | Staff training –amount    | Document review or self-report | No training             | <1 hour/year                                                                                                  | 1–4 hours/year                                                            | >4 hours/year                                                                                                                            |                                     |     |
|                            | Staff training quality    | Document review or self-report | No training             | Training delivered by noncertified personnel                                                                  | Training delivered by qualified professional                              |                                                                                                                                          |                                     |     |
|                            | Parent workshops          | Document review or self-report | None                    | One per year                                                                                                  | More than two per year                                                    |                                                                                                                                          |                                     |     |
| Curricula                  |                           | Document review                | None                    | Non evidence-based curriculum                                                                                 | Evidence-based curriculum                                                 |                                                                                                                                          |                                     |     |
| Evaluation                 |                           | Document review or observation | None                    | Limited evaluation (e.g., single time per year)<br>Nonvalid methods (e.g., staff reports, child self-reports) | Ongoing evaluation (e.g., two or more times per year)<br>Nonvalid methods | Limited evaluation<br>Valid methods (e.g., using nutrition calculator to determine whether snack served meets national/local guidelines) | Ongoing evaluation<br>Valid methods |     |
|                            |                           |                                |                         |                                                                                                               |                                                                           |                                                                                                                                          | Total Score                         | /34 |

Star rating: 1-6 = ★; 7-14=★★; 15-21=★★★; 22-27=★★★★; 28-34=★★★★★

**Healthy Afterschool Program Index (HAPI [Nutrition])**

| Domain                     | Item                      | Source                         | Notes/comments |
|----------------------------|---------------------------|--------------------------------|----------------|
| Policy                     | Written policies          | Document review                |                |
| Child involvement          | Feedback                  | Document review or self-report |                |
| Quality of Snacks          | Fruits and vegetables     | Document review or observation |                |
|                            | Sugar-sweetened beverages | Document review or observation |                |
|                            | Whole grains              | Document review or observation |                |
| Access to vending machines |                           | Document review or observation |                |
| Training                   | Staff training            | Document review                |                |
|                            |                           | Document review                |                |
|                            | Parent workshops          | Document review                |                |
| Curricula                  |                           | Document review                |                |
| Evaluation                 |                           | Document review or observation |                |

## Appendix B

### Term definitions for Healthy Afterschool Program Index for Physical Activity (HAPI-PA)

| Domain                        | Term definition                                                                                                                                                          | Score | Score definition                                                                                                                                                                               |
|-------------------------------|--------------------------------------------------------------------------------------------------------------------------------------------------------------------------|-------|------------------------------------------------------------------------------------------------------------------------------------------------------------------------------------------------|
| Policy                        | Formal written codes, regulation, standards and or/benchmarks that guide the promotion and behavioral choice related to physical activity within the afterschool program | 0     | No written policies                                                                                                                                                                            |
|                               |                                                                                                                                                                          | 1     | Written policies, nonspecific language (e.g., the program will offer physical activity opportunities for children)                                                                             |
|                               |                                                                                                                                                                          | 2     | Written policies, explicit language (e.g., children are expected to participate in at least 30 minutes of moderate-to-vigorous physical activity of every 3-hour block of time at the program) |
| Child involvement             | Children/parents are given the opportunity to provide feedback about the activities/games offered at the afterschool program.                                            | 0     | None                                                                                                                                                                                           |
|                               |                                                                                                                                                                          | 1     | Informal collection (e.g., verbal communication where staff ask the children about their favorite activities)                                                                                  |
|                               |                                                                                                                                                                          | 2     | Formal collection (e.g., surveys are sent to children and parent biannually to get their feedback about the program activities)                                                                |
| Training on physical activity | Physical activity training for staff including training in planning, programming, and carrying out suitable physical activity                                            | 0     | No training for physical activity                                                                                                                                                              |
|                               |                                                                                                                                                                          | 1     | <1 hour devoted to physical activity/year                                                                                                                                                      |
|                               |                                                                                                                                                                          | 2     | 1-4 hours devoted to physical activity/year                                                                                                                                                    |
|                               |                                                                                                                                                                          | 3     | >4 hours/year                                                                                                                                                                                  |
| Staff training quality        | Physical activity trainer credential (e.g., physical educator, health promotion specialist, graduate degree in health education field)                                   | 0     | No training for physical activity                                                                                                                                                              |
|                               |                                                                                                                                                                          | 1     | Training delivered by noncertified personnel (i.e., afterschool program counselor without physical activity certification)                                                                     |
|                               |                                                                                                                                                                          | 2     | Training delivered by qualified professional (i.e., physical educator, health promotion specialist, graduate degree in health education field)                                                 |
| Parent workshop               | Training workshops for parent on physical activity promotion                                                                                                             | 0     | None                                                                                                                                                                                           |
|                               |                                                                                                                                                                          | 1     | 1/year                                                                                                                                                                                         |
|                               |                                                                                                                                                                          | 2     | >2/year                                                                                                                                                                                        |
| Curricula                     | The physical activity curriculum used/utilized by the program can be purchased either as a package or as an evidence-based curriculum.                                   | 0     | None                                                                                                                                                                                           |
|                               |                                                                                                                                                                          | 2     | Non-evidence based curriculum (e.g., physical activity tracks and games are developed by the after school program and not based on published evidence)                                         |
|                               |                                                                                                                                                                          | 2     | Evidence-based curriculum (i.e., curriculum has been scientifically evaluated)                                                                                                                 |
| Evaluation                    | The program implements evaluation that includes gathering both qualitative and quantitative data.                                                                        | 0     | None                                                                                                                                                                                           |
|                               |                                                                                                                                                                          | 1     | Limited evaluation/nonvalid methods (e.g., one time per year/staff or child self-report)                                                                                                       |
|                               |                                                                                                                                                                          | 2     | Ongoing evaluation/nonvalid methods (e.g., two or more times per year/staff or child self-report)                                                                                              |
|                               |                                                                                                                                                                          | 3     | Limited evaluation/valid methods (e.g., one time per year/using pedometer, accelerometer, or trained observer)                                                                                 |
|                               |                                                                                                                                                                          | 4     | Ongoing evaluation/valid methods (e.g., two or more times per year/using pedometer, accelerometer, or trained observer)                                                                        |

| Domain                        | Term definition                                                                                                                | Score | Score definition                                                                                                                                                                                                            |
|-------------------------------|--------------------------------------------------------------------------------------------------------------------------------|-------|-----------------------------------------------------------------------------------------------------------------------------------------------------------------------------------------------------------------------------|
| Schedule of physical activity | Physical activities follow a schedule that is both accessible and known to all staff, participants, and their families         | 0     | No scheduled time                                                                                                                                                                                                           |
|                               |                                                                                                                                | 1     | <25% of afterschool program time                                                                                                                                                                                            |
|                               |                                                                                                                                | 2     | 25%–49% of the scheduled program time                                                                                                                                                                                       |
|                               |                                                                                                                                | 3     | ≥50% of scheduled program time                                                                                                                                                                                              |
| Type of physical activity     | The type of physical activity activities, games, and/or tracks that are offered at the program                                 | 0     | Free play (i.e., unstructured games where the children are free to play any games)                                                                                                                                          |
|                               |                                                                                                                                | 1     | Limited # activities (i.e., only one to two physical activity games are offered to the children)                                                                                                                            |
|                               |                                                                                                                                | 2     | Diverse range of activities (i.e., at least two physical activity tracks are offered and the type of games included range from sports such as football, soccer, and basketball to dance, tag games, and similar activities) |
| Equity                        | Physical activity activities offered at the program must appeal to both genders as well as to children of varying skill levels | 0     | Activities favor one gender (e.g., offering football only)                                                                                                                                                                  |
|                               |                                                                                                                                | 1     | Activities appeal to both genders (e.g., physical activity tracks include a choice of activities such as dance, tag games, basketball, soccer)                                                                              |

## Appendix C

### Term definition for Healthy Afterschool Program Index for Nutrition (HAPI-N)

| Domain                     | Term definition                                                                                                                                                                       | Score | Score definition                                                                                                                                                      |
|----------------------------|---------------------------------------------------------------------------------------------------------------------------------------------------------------------------------------|-------|-----------------------------------------------------------------------------------------------------------------------------------------------------------------------|
| Policy                     | Formal written codes, regulation, standards and or/benchmarks that guide the promotion and behavioral choice related to serving healthy nutritious snacks while attending the program | 0     | No written policies                                                                                                                                                   |
|                            |                                                                                                                                                                                       | 1     | Written policies, nonspecific language (e.g., children will be provided with healthy nutritious snacks during their time at the program)                              |
|                            |                                                                                                                                                                                       | 2     | Written policies, explicit language (e.g., at least two of the following snack components must be served at snack time: whole grains, milk, fruit, vegetables)        |
| Child involvement          | Children/parents are given the opportunity to provide feedback about the snack offered at the afterschool program                                                                     | 0     | None                                                                                                                                                                  |
|                            |                                                                                                                                                                                       | 1     | Informal collection (e.g., verbal communication where staff ask the children about the snack served at the program)                                                   |
|                            |                                                                                                                                                                                       | 3     | Formal collection (e.g., surveys are sent to children and parents biannually to get their feedback about the snacks served at the program)                            |
| Training on nutrition      | Training for staff in preparing healthy snacks, as well as promoting healthy food choices                                                                                             | 0     | No training on healthy nutrition promotion                                                                                                                            |
|                            |                                                                                                                                                                                       | 1     | <1 hour devoted to physical activity/year                                                                                                                             |
|                            |                                                                                                                                                                                       | 2     | 1–4 hours devoted to physical activity/year                                                                                                                           |
|                            |                                                                                                                                                                                       | 3     | >4 hours/year                                                                                                                                                         |
| Staff training quality     | Nutrition trainer credential/ background training                                                                                                                                     | 0     | No training on healthy nutrition promotion                                                                                                                            |
|                            |                                                                                                                                                                                       | 1     | Training delivered by noncertified personnel (i.e., afterschool program counselor without nutrition training certification)                                           |
|                            |                                                                                                                                                                                       | 2     | Training delivered by qualified professional (i.e., nutritionist, health promotion specialist, graduate degree in health education field)                             |
| Parent workshop            | Providing workshop sessions for parents on healthy snacks and healthy food choices                                                                                                    | 0     | None                                                                                                                                                                  |
|                            |                                                                                                                                                                                       | 1     | One per year                                                                                                                                                          |
|                            |                                                                                                                                                                                       | 2     | More than two per year                                                                                                                                                |
| Curricula                  | The nutrition curriculum used/utilized by the program can be either purchased as a package or developed by the specific afterschool program                                           | 0     | None                                                                                                                                                                  |
|                            |                                                                                                                                                                                       | 1     | Non–evidence based curriculum (e.g., the program offers nutrition education sessions to the children developed by the staff at the program)                           |
|                            |                                                                                                                                                                                       | 2     | Evidence-based curriculum (i.e., curriculum has been scientifically evaluated)                                                                                        |
| Evaluation                 | The program implements evaluation that includes gathering both qualitative and quantitative data                                                                                      | 0     | None                                                                                                                                                                  |
|                            |                                                                                                                                                                                       | 1     | Limited evaluation/nonvalid methods (e.g., one time per year /staff or child self-report of snack served)                                                             |
|                            |                                                                                                                                                                                       | 2     | Ongoing evaluation/ nonvalid methods (e.g., two or more per year/ staff or child self-report)                                                                         |
|                            |                                                                                                                                                                                       | 3     | Limited evaluation/valid methods (e.g., one time per year using, for example, nutrition calculator to determine whether snacks served meet national/local guidelines) |
|                            |                                                                                                                                                                                       | 4     | Ongoing evaluation/valid methods (e.g., one time per year using, for example, nutrition calculator to determine whether snacks served meet national/local guidelines) |
| Access to vending machines |                                                                                                                                                                                       | 0     | No access                                                                                                                                                             |
|                            |                                                                                                                                                                                       | 1     | Full access                                                                                                                                                           |

| Domain                                                                      | Term definition                                                                              | Score                   | Score definition        |
|-----------------------------------------------------------------------------|----------------------------------------------------------------------------------------------|-------------------------|-------------------------|
| Quality of snacks                                                           | The nutritional value of the snacks or food provided to the children during the program time | 0                       | None served             |
|                                                                             |                                                                                              | 1                       | One time/week           |
|                                                                             |                                                                                              | 2                       | Two times/week          |
|                                                                             |                                                                                              | 3                       | Three times/week        |
|                                                                             |                                                                                              | 4                       | Four or more times/week |
|                                                                             | Fruit and vegetable (i.e., fresh, dried, frozen, canned with no added sugar)                 | 0                       | None served             |
|                                                                             |                                                                                              | 1                       | One time/week           |
|                                                                             |                                                                                              | 2                       | Two times/week          |
|                                                                             |                                                                                              | 3                       | Three times/week        |
|                                                                             |                                                                                              | 4                       | Four or more times/week |
|                                                                             | Sugar-sweetened beverages (e.g., sodas, fruit-ades, sweetened iced tea, and sports drinks)   | 0                       | Four or more times/week |
|                                                                             |                                                                                              | 1                       | Three times/week        |
|                                                                             |                                                                                              | 2                       | Two times/week          |
| 3                                                                           |                                                                                              | One time/week           |                         |
| 4                                                                           |                                                                                              | None served             |                         |
| Whole grain (i.e., snack contains whole grains as part of the ingredients ) | 0                                                                                            | None served             |                         |
|                                                                             | 1                                                                                            | One time/week           |                         |
|                                                                             | 2                                                                                            | Two times/week          |                         |
|                                                                             | 3                                                                                            | Three times/week        |                         |
|                                                                             | 4                                                                                            | Four or more times/week |                         |

## Appendix D

### Healthy Afterschool Activity and Nutrition Document (HAAND) domain/item alignment with existing standards

| Scale   | Domain                         | Item                           | Source                                                          | Standard                                                                                                                         |
|---------|--------------------------------|--------------------------------|-----------------------------------------------------------------|----------------------------------------------------------------------------------------------------------------------------------|
| HAPI-PA | Policy                         | Written policies               | Document review                                                 | OST 5, SACERS Healthy Safety, NYSAN 4, NYSAN 9, NAA Program Support                                                              |
|         | Child involvement              | Feedback                       | Document review/self-report                                     | ECCD 7, OST 5, NYSAN 7, NAA Social Support                                                                                       |
|         | Schedule of physical activity  | Time allocated                 | Document review or observation                                  | OST 7, SACERS Program Structure, NAA Content and Quality                                                                         |
|         |                                | Types of activities            | Document review or observation                                  | OST 5, NYSAN 5, NAA Content and Quality                                                                                          |
|         | Training for physical activity | Equity                         | Document review or observation                                  | OST 5, OST 7, NAA Content and Quality                                                                                            |
|         |                                | Staff training amount          | Document review/ self-report                                    | ECCD 12, OST 3, OST 13, SACERS Staff Development, NYSAN 4, NAA Staff Training                                                    |
|         |                                | Staff training quality         | Document review/ self-report                                    | ECCD 12, OST 3, OST 13, SACERS Staff Development, NYSAN 4, NAA Staff Training                                                    |
|         |                                | Parent workshop                | Document review/ self-report                                    | ECCD 3, OST 9, NYSAN 8, NAA Social Support                                                                                       |
|         | Curricula                      |                                | Document review                                                 |                                                                                                                                  |
|         | Evaluation                     |                                | Document review or observation                                  | NYSAN 10, NAA Program Support                                                                                                    |
| HAPI-N  | Policy                         | Written policies               | Document review                                                 | OST 5, SACERS Healthy Safety, NYSAN 4, NYSAN 9, NAA Program Support                                                              |
|         | Child involvement              | Feedback                       | Document review/self-report                                     | ECCD 7, OST 5, NYSAN 7, NAA Social Support                                                                                       |
|         | Quality of snacks              | F&V                            | Document review or observation                                  | USDA Reimbursement Guidelines, Harvard Prevention Center Guidelines, ECCD 12, OST 8, SACERS 18, NYSAN 1, NAA Content and Quality |
|         |                                | Sugar-sweetened beverages      | Document review or observation                                  | USDA Reimbursement Guidelines, Harvard Prevention Center Guidelines, ECCD 12, OST 8, SACERS 18, NYSAN 1, NAA Content and Quality |
|         | Access to vending machines     | Whole grains                   | Document review or observation                                  | USDA Reimbursement Guidelines, Harvard Prevention Center Guidelines, ECCD 12, OST 8, SACERS 18, NYSAN 1, NAA Content and Quality |
|         |                                | Document review or observation | Harvard Prevention Center Guidelines, NAA Environmental Support |                                                                                                                                  |

| Scale | Domain     | Item                   | Source                         | Standard                                                                      |
|-------|------------|------------------------|--------------------------------|-------------------------------------------------------------------------------|
|       | Training   | Staff training amount  | Document review                | ECCD 12, OST 3, OST 13, SACERS Staff Development, NYSAN 4, NAA Staff Training |
|       |            | Staff training quality | Document review                | ECCD 12, OST 3, OST 13, SACERS Staff Development, NYSAN 4, NAA Staff Training |
|       |            | Parent workshops       | Document review                | ECCD 3, OST 9, NYSAN 8, Social Support                                        |
|       | Curricula  |                        | Document review                | NAA Nutrition Education Curriculum                                            |
|       | Evaluation |                        | Document review or observation | NYSAN 10                                                                      |

ECCD ([www.coastandards.org](http://www.coastandards.org)), Early Child Care and Development Services (Council on Accreditation); F&V, fruits and vegetables; HAPI-N, Healthy Afterschool Program Index for Nutrition; HAPI-PA, Healthy Afterschool Program Index for Physical Activity; NAA ([www.niost.org](http://www.niost.org)), National AfterSchool Association; NYSAN ([www.nysan.org/](http://www.nysan.org/)), New York State Afterschool Network Program Quality Self-Assessment; OST, Out-of-School Time Services; SACERS ([ers.fpg.unc.edu/](http://ers.fpg.unc.edu/)), School-Age Care Environment Rating Scale; USDA, U.S. Department of Agriculture
